# Supplementary material
Source: publisher site journal article supplement (https://bdj.pensoft.net/article/download/suppl/8104087/)
Supplement: Supplementary file

## Disambiguation Trigger

*Disambiguation Trigger*

Search name  
in Google

*Google search*

- 1- Very broad
- 2- Shallow
- 3- Good for dead and living people

Assess result

*Assess result*

- 1- Process of assessment
- 2- What is considered certainty - can it be measured

Find person  
with certainty

Find person  
without certainty

Do not find  
person

Search Biodiversity  
Heritage Library (BHL)

*BHL Search*

- 1- Less broad
- 2- Full text search: deep searching every word in the ocr results
- 3- Better for dead people than living

Assess result

Find person  
with certainty

Find person  
without certainty

Do not find  
person

Search Internet  
Archive

*Internet Archive Search*

- 1- Broad
- 2- Deep searching every word in the ocr results
- 3- Better for dead people than living

Assess result

Find person  
with certainty

Find person  
without certainty

Do not find  
person

Search Genealogy  
Resources

*Genealogy Resource Search*

- 1- Focussed
- 2- Deep searching every word in the ocr results
- 3- Better for dead people than living

Assess result

Find person  
with certainty

Find person  
without certainty

Do not find  
person

*Record assessment*  
1- Record each assessment  
(including negative)

Record  
assessment

Is there an  
identifier?

NO

YES

Link to identifier

Create identifier  
record

*Identifier*

- 1- Wikidata or ORCID if available
- 2- Enhance the identifier record if possible

# Representation of an online disambiguation strategy

Search may be iterative  
and could include  
previous search results
